# Supplementary material for: Global prevalence of metabolic dysfunction-associated fatty liver disease-related hepatocellular carcinoma: A systematic review and meta-analysis
Source: PubMed Central journal article supplement — Clin Mol Hepatol. 2024 Apr 16;30(3):436–48. doi: 10.3350/cmh.2024.0109 (PMC11261220; doi:10.3350/cmh.2024.0109), 2024-04-16
Supplement: cmh-2024-0109-Supplementary-Fig-1.pdf [file cmh-2024-0109-Supplementary-Fig-1.pdf]

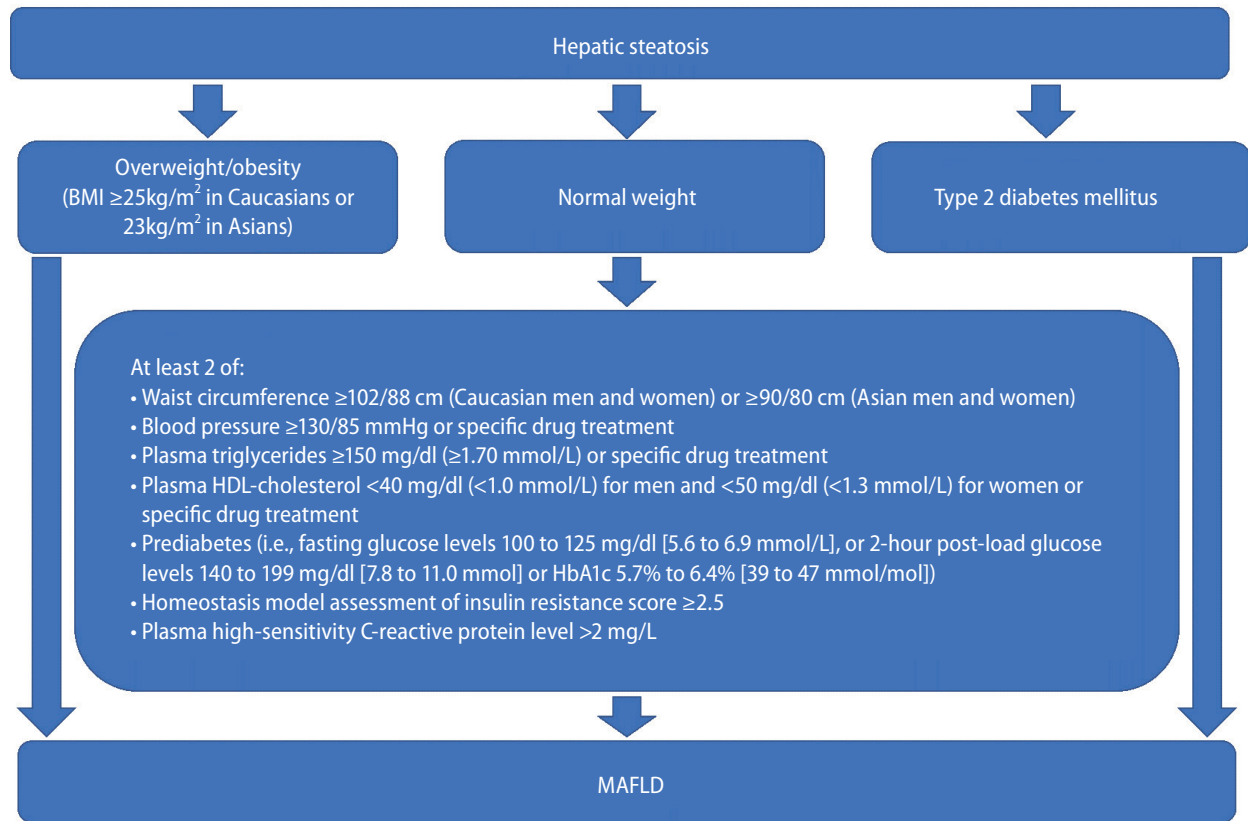

**Supplementary Figure 1.** MAFLD diagnostic criteria (adapted with permission from <sup>1</sup>). MAFLD, metabolic dysfunction-associated fatty liver disease; BMI, body mass index; HDL, High-density lipoprotein.
