# Supplementary material for: Global prevalence of metabolic dysfunction-associated fatty liver disease-related hepatocellular carcinoma: A systematic review and meta-analysis
Source: PubMed Central journal article supplement — Clin Mol Hepatol. 2024 Apr 16;30(3):436–48. doi: 10.3350/cmh.2024.0109 (PMC11261220; doi:10.3350/cmh.2024.0109), 2024-04-16
Supplement: cmh-2024-0109-Supplementary-Fig-2.pdf [file cmh-2024-0109-Supplementary-Fig-2.pdf]

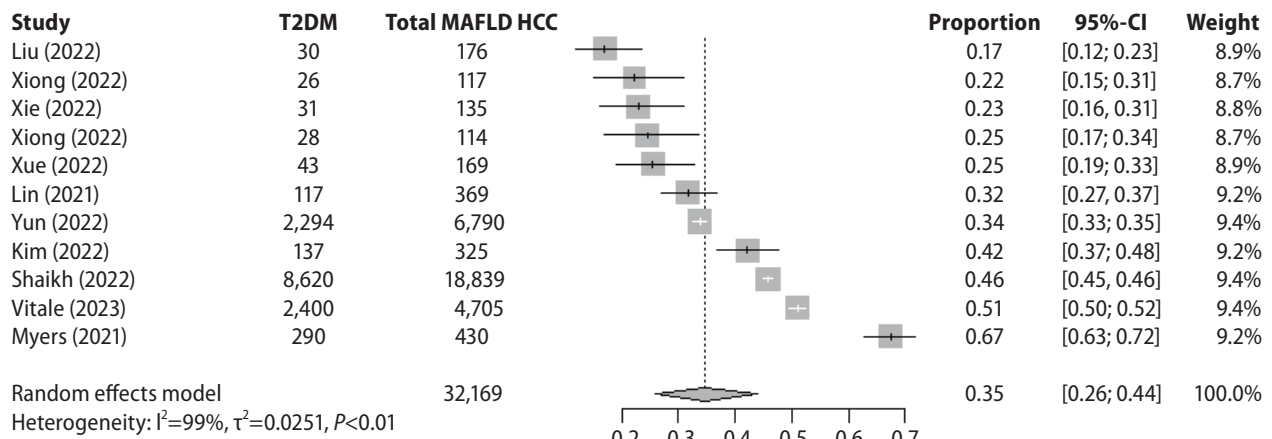

**A**

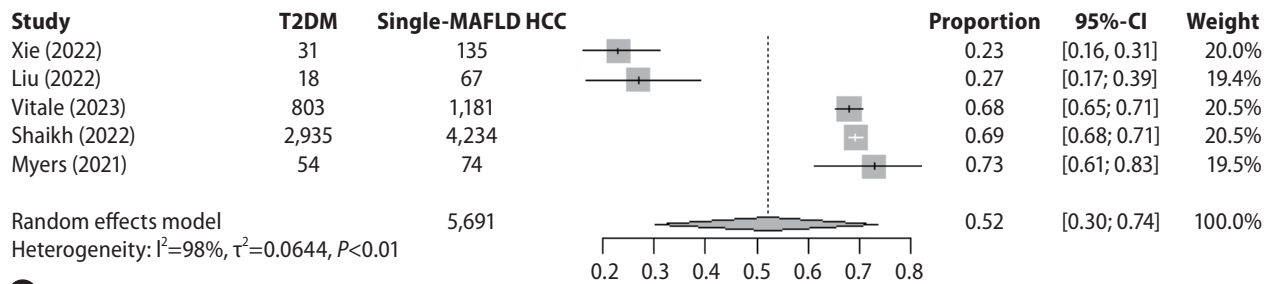

**B**

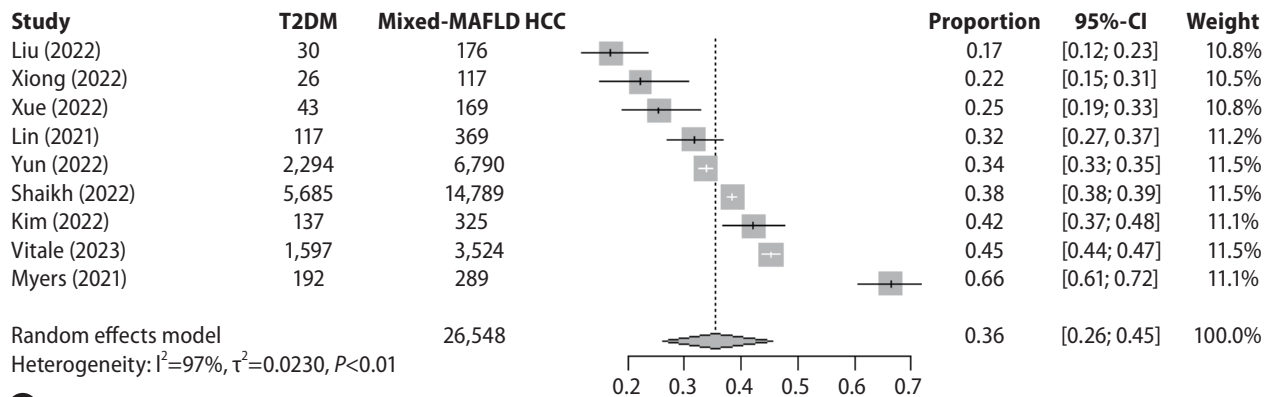

**C**

**Supplementary Figure 2.** Forrest plots and pooled prevalence of T2DM in all individuals with MAFLD-HCC (A), single-aetiology MAFLD-HCC (B), and mixed-aetiology MAFLD HCC (C). T2DM, type 2 diabetes mellitus; MAFLD, metabolic dysfunction-associated fatty liver disease; HCC, hepatocellular carcinoma; CI, confidence interval.
