# Supplementary material for: Global prevalence of metabolic dysfunction-associated fatty liver disease-related hepatocellular carcinoma: A systematic review and meta-analysis
Source: PubMed Central journal article supplement — Clin Mol Hepatol. 2024 Apr 16;30(3):436–48. doi: 10.3350/cmh.2024.0109 (PMC11261220; doi:10.3350/cmh.2024.0109), 2024-04-16
Supplement: cmh-2024-0109-Supplementary-Fig-4.pdf [file cmh-2024-0109-Supplementary-Fig-4.pdf]

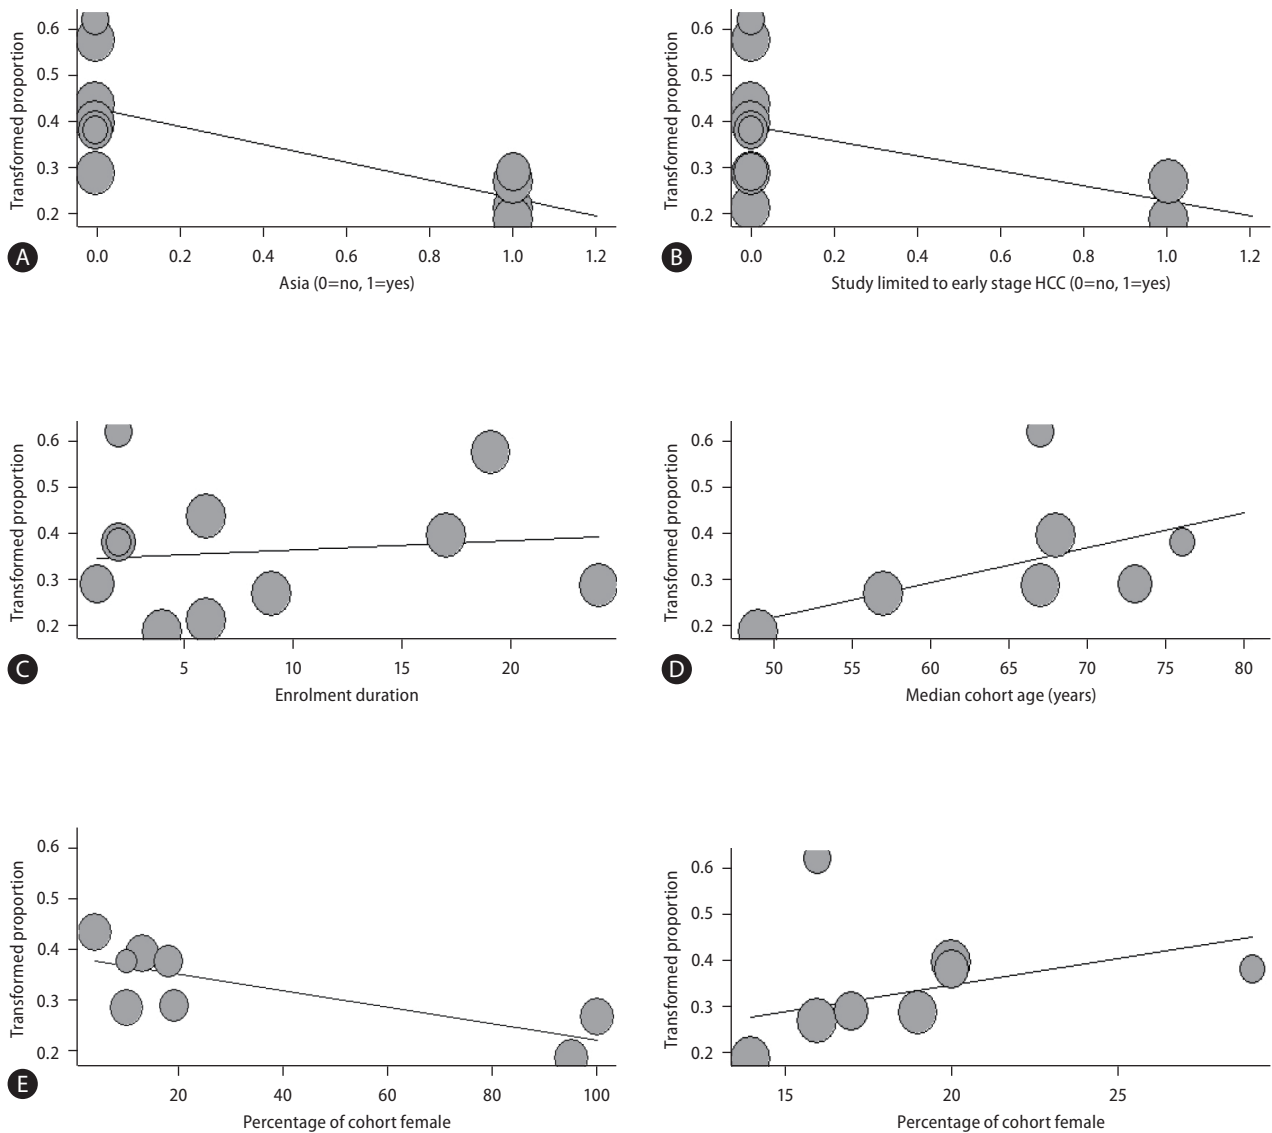

**Supplementary Figure 4.** Meta-regression analysis as depicted by bubble plots for single-MAFLD HCC. Transformed prevalence depicted on y-axis. Sources of heterogeneity assessed are whether study conducted within Asia (A), whether study limited to early stage HCC cohorts (B), enrolment duration (C), median cohort age (D), proportion of HCC cohort with HBV (E), and proportion of cohort female (F). MAFLD, metabolic dysfunction-associated fatty liver disease; HCC, hepatocellular carcinoma; HBV, hepatitis B virus.
