# Supplementary material for: Global prevalence of metabolic dysfunction-associated fatty liver disease-related hepatocellular carcinoma: A systematic review and meta-analysis
Source: PubMed Central journal article supplement — Clin Mol Hepatol. 2024 Apr 16;30(3):436–48. doi: 10.3350/cmh.2024.0109 (PMC11261220; doi:10.3350/cmh.2024.0109), 2024-04-16
Supplement: cmh-2024-0109-Supplementary-Fig-6.pdf [file cmh-2024-0109-Supplementary-Fig-6.pdf]

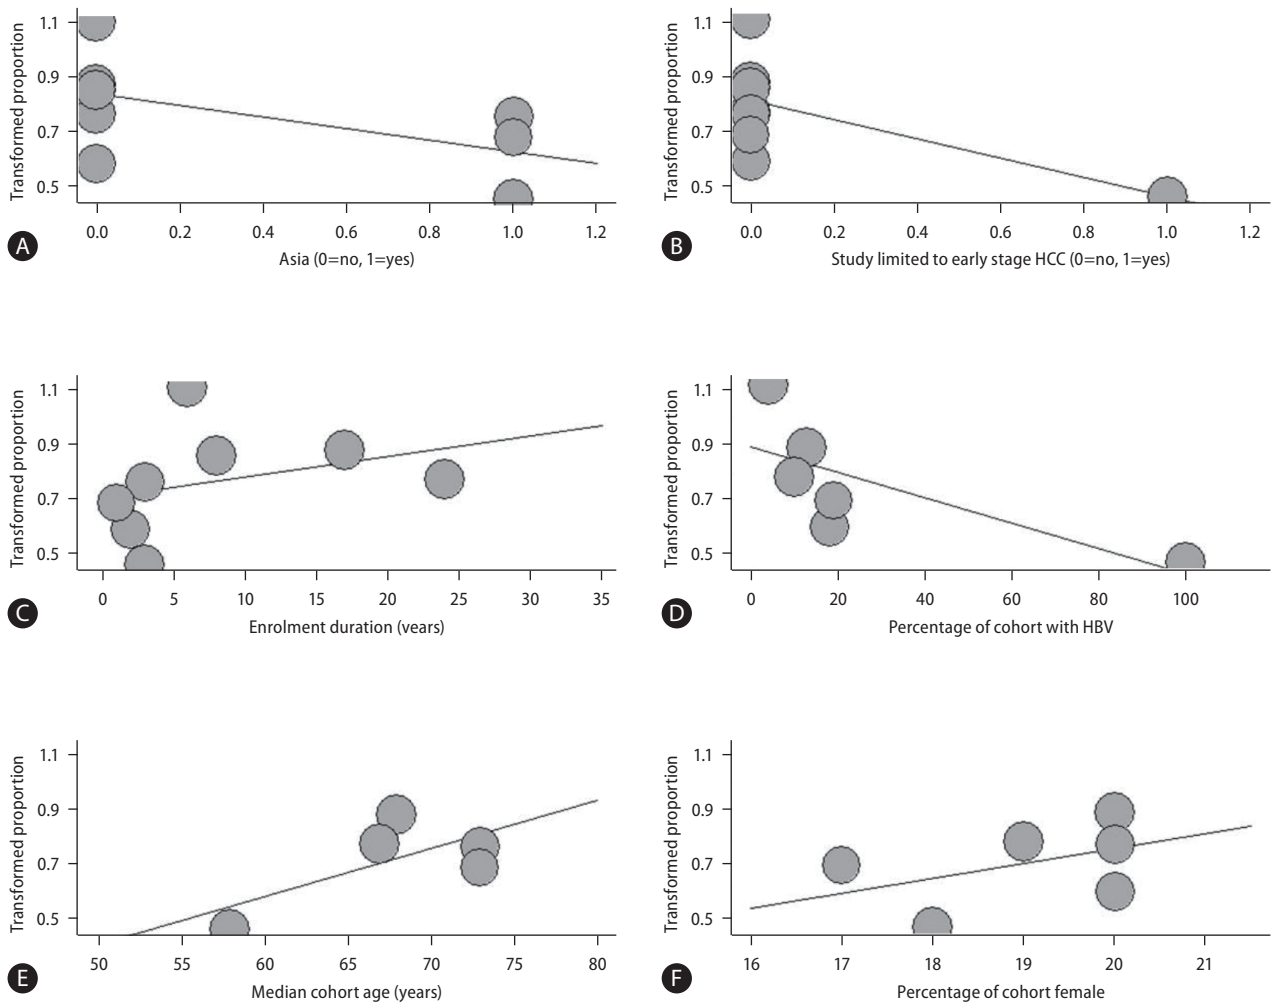

**Supplementary Figure 6.** Total-MAFLD HCC meta-regression bubble plots showing whether study conducted within Asia (A), whether study limited to early stage HCC cohorts (B), enrolment duration (C), median cohort age (D), proportion of HCC cohort with HBV (E), and proportion of cohort female (F). MAFLD, metabolic dysfunction-associated fatty liver disease; HCC, hepatocellular carcinoma; HBV, hepatitis B virus.
