# Supplementary material for: Global prevalence of metabolic dysfunction-associated fatty liver disease-related hepatocellular carcinoma: A systematic review and meta-analysis
Source: PubMed Central journal article supplement — Clin Mol Hepatol. 2024 Apr 16;30(3):436–48. doi: 10.3350/cmh.2024.0109 (PMC11261220; doi:10.3350/cmh.2024.0109), 2024-04-16
Supplement: cmh-2024-0109-Supplementary-Table-2.pdf [file cmh-2024-0109-Supplementary-Table-2.pdf]

**Supplementary Table 2.** Characteristics of studies included in meta-analysis

| Study                              | Article / abstract | Cohort characteristics                                                                                                                   | HCC cohort size included in analysis | MAFLD                                                                                                                                                                                                      | Steatosis                         | Country           |
|------------------------------------|--------------------|------------------------------------------------------------------------------------------------------------------------------------------|--------------------------------------|------------------------------------------------------------------------------------------------------------------------------------------------------------------------------------------------------------|-----------------------------------|-------------------|
| Vitale et al. <sup>2</sup> (2023)  | Article            | ITA.LICA HCC registry enrolled HCC cases (2002–2019)                                                                                     | 7,816                                | Overweight/obesity (BMI>25 kg/m <sup>2</sup> )<br>T2DM<br>Elevated fasting glucose, triglycerides, low HDL, HTN<br>(No data on CRP, waist circumference, HOMA-IR)                                          | No steatosis data                 | Italy             |
| Myers et al. <sup>3</sup> (2021)   | Article            | Geneva HCC registry consecutively enrolled HCC cases (1990–2014)                                                                         | 920                                  | Overweight/obesity (BMI>25 kg/m <sup>2</sup> )<br>T2DM<br>or “evidence of metabolic dysregulation”                                                                                                         | Histology, biomarker or radiology | Switzerland       |
| Lin et al. <sup>4</sup> (2022)     | Article            | BCLC-0/A HCC receiving curative hepatectomy from Chang Gung Research Database (CGRD) in Taiwan (2009–2018)                               | 1,653                                | Overweight/obesity,<br>T2DM, or >2 features metabolic dysregulation (Elevated fasting glucose, triglycerides, low HDL, HTN, elevated CRP, waist circumference (≥90/80 cm in Asian men and women), HOMA-IR) | Histological                      | Taiwan            |
| Kim et al. <sup>5</sup> (2022)     | Abstract           | 63,000 patients with viral hepatitis undergoing health examinations in 2009, follow up median 8.4 years. (HCV subgroup only in analysis) | 606                                  | Overweight/obesity (BMI >23 kg/m <sup>2</sup> )<br>T2DM or metabolic dysregulation (>2 features)                                                                                                           | Biomarker                         | Republic of Korea |
| Shaikh et al. <sup>6</sup> (2022)  | Abstract           | UNOS database, patients listed for liver transplant for HCC (2015–2021)                                                                  | 23,245                               | Overweight/obesity (BMI>25 kg/m <sup>2</sup> ) or T2DM                                                                                                                                                     | No steatosis data                 | USA               |
| Xiong et al. <sup>7</sup> (2022)   | Article            | HBV HCC patients undergoing hepatectomy at Meng Chao Hepatobiliary Hospital, China (2019–2021)                                           | 514                                  | Overweight/obesity (BMI>23 kg/m <sup>2</sup> ),<br>T2DM, or >2 features metabolic dysregulation                                                                                                            | Histological                      | Mainland China    |
| Xiong et al. <sup>8</sup> (2022)   | Article            | Patients who underwent radical HCC resection at Mengchao Hepatobiliary Hospital (China) (2015–2018)                                      | 576                                  | BMI>23, T2DM or 2 metabolic risk factors.                                                                                                                                                                  | Histological                      | Mainland China    |
| Shimose et al. <sup>9</sup> (2023) | Article            | Patients with advanced HCC from 7 institutions in Japan and Italy treated with lenvatinib (2018–2021)                                    | 320                                  | Overweight/obese, T2DM, or “metabolic risk abnormalities”                                                                                                                                                  | Radiological or biomarker         | Japan, Italy      |

Supplementary Table 2. Continued

| Study                                     | Article / abstract | Cohort characteristics                                                                                                                                        | HCC cohort size included in analysis | MAFLD                                                                                  | Steatosis                    | Country           |
|-------------------------------------------|--------------------|---------------------------------------------------------------------------------------------------------------------------------------------------------------|--------------------------------------|----------------------------------------------------------------------------------------|------------------------------|-------------------|
| Nakagawa et al. <sup>10</sup> (2023)      | Article            | Patients receiving atezolizumab + bevacizumab in seven Japanese institutions for advanced HCC (2020–2021)                                                     | 123                                  | Referenced consensus statement "Based on latest definitions".                          | Not reported                 | Japan             |
| Yun et al. <sup>11</sup> (2022)           | Article            | Korean Health Insurance registry cohort, HBV related HCC (2010–2018)                                                                                          | 13,771                               | BMI>23, diabetes or >2 metabolic risk factors.                                         | Biomarker                    | Republic of Korea |
| Xue et al. <sup>22</sup> (2022)           | Article            | Chinese single centre HBV related HCC cohort Guangdong Provincial Hospital (2010–2022)                                                                        | 549                                  | BMI>23, T2DM or >2 metabolic abnormalities                                             | Radiological or histological | Mainland China    |
| Amano et al. <sup>13</sup> (2022)         | Abstract           | Retrospective cohort study, HCC with e antigen negative HBV on antiviral therapy single centre (median observation period 9.0 years [2.1–19.6 years])         | 34                                   | "combines fatty liver and metabolic abnormalities"                                     | Not reported                 | Japan             |
| Clark-Dickson et al. <sup>14</sup> (2022) | Abstract           | Single centre retrospective Australian HCC cohort (2018–2020)                                                                                                 | 38                                   | Consensus statement definitions (author clarification).                                | Not reported                 | Australia         |
| Iyer et al. <sup>15</sup> (2022)          | Abstract           | Single centre retrospective Australian HCC cohort (2018–2020)                                                                                                 | 137                                  | Consensus statement definitions (author clarification).                                | Not reported                 | Australia         |
| Lin et al. <sup>16</sup> (2021)           | Article            | Taiwan single centre cohort with BCLC stage 0/A HBV related HCC undergoing curative resection (2010–2019)                                                     | 812                                  | BMI>23, T2DM, >2 metabolic abnormalities                                               | Histological                 | Taiwan            |
| Liu et al. <sup>17</sup> (2022)           | Article            | Patients undergoing curative liver resection of HCC at 2 centres in China (2014–2018)                                                                         | 1,258                                | Overweight/obese (BMI>23), T2DM, >2 metabolic abnormalities                            | Radiological or histological | Mainland China    |
| Liu et al. <sup>18</sup> (2022)           | Article            | UK biobank participants, Caucasian ethnic background only. Participants recruited 2006–2010 who developed HCC with median follow up 8.2 years [7.5–8.9 years] | 453                                  | Overweight or obesity (BMI>25), T2DM or presence of at least 2 metabolic abnormalities | Biomarker                    | United Kingdom    |
| Rodrigues et al. <sup>19</sup> (2021)     | Abstract           | Consecutive HCC cases at single centre in Victoria (2019–2021)                                                                                                | 50                                   | Overweight/obesity, diabetes or >2 metabolic risk factors                              | Not reported                 | Australia         |

**Supplementary Table 2.** Continued

| Study                                         | Article / abstract | Cohort characteristics                                                                                                                                                                                             | HCC cohort size included in analysis | MAFLD                                                                                                | Steatosis                                 | Country                |
|-----------------------------------------------|--------------------|--------------------------------------------------------------------------------------------------------------------------------------------------------------------------------------------------------------------|--------------------------------------|------------------------------------------------------------------------------------------------------|-------------------------------------------|------------------------|
| van Kleef et al. <sup>20</sup> (2021)         | Article            | Multicentre retrospective cohort, HBV positive patients who underwent liver biopsy at centre in Toronto (2005–2016) or Rotterdam (1985–2002) who developed HCC during median follow up 9.8 years [6.6–14.0 years]. | 36                                   | BMI >23 in Asians, >25 non-Asians, T2DM or >2 metabolic abnormalities                                | Histological                              | Canada/<br>Netherlands |
| Vanlerberghe et al. <sup>21</sup> (2023)      | Article            | Patients with HCC on liver explant who underwent liver transplant for ALD at single centre in Belgium (1990–2020)                                                                                                  | 142                                  | Steatosis plus overweight, diabetes or >2 metabolic risk factors (HTN, dyslipidaemia or prediabetes) | Not reported                              | Belgium                |
| Xie et al. <sup>22</sup> (2022)               | Article            | Patients with HCC at Second Affiliated Hospital of Kunming Medical University, China between 2015–2020                                                                                                             | 2,965                                | Overweight / obese (BMI>23), T2DM or “metabolic syndrome”                                            | Histological or radiological or biomarker | Mainland China         |
| Gonzalez-Chagolla et al. <sup>23</sup> (2021) | Article            | Retrospective cohort from six tertiary care centres in Central Mexico evaluating cirrhosis aetiology, HCC cohort of 547 patients (2000–2019)                                                                       | 547                                  | BMI>25, T2DM, >2 features of metabolic dysfunction.                                                  | Not reported                              | Mexico                 |

HCC, hepatocellular carcinoma; BMI, body mass index; HDL, High-density lipoprotein; HTN, Hypertension; HOMA-IR, Homeostasis model assessment for insulin resistance; T2DM, type 2 diabetes mellitus; HCV, hepatitis C virus; UNOS, United Network for Organ Sharing; HBV, hepatitis B virus; ALD, alcohol-related liver disease.
